# Supplementary material
Source: PubMed Central journal article supplement (PMC9622895)
Supplement: 41401_2022_913_MOESM1_ESM.pdf [file 41401_2022_913_MOESM1_ESM.pdf]

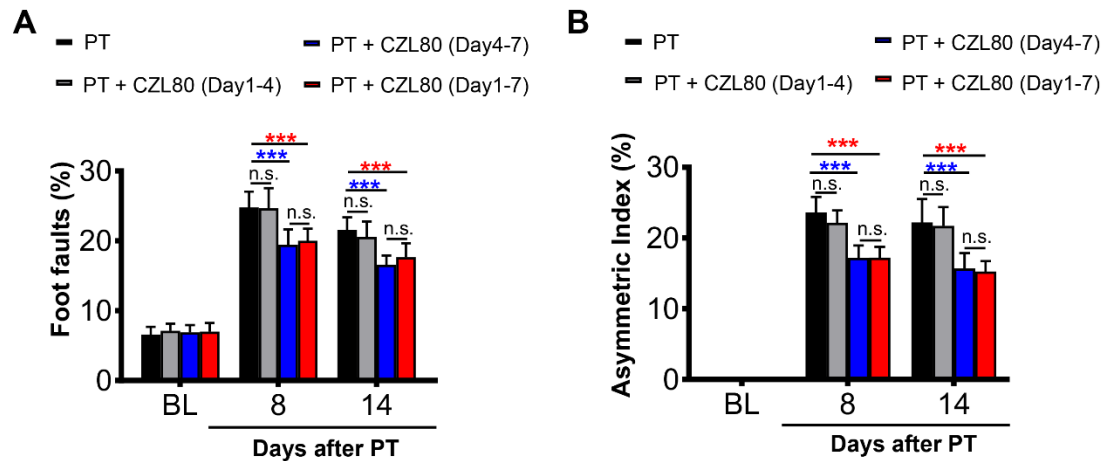

**Fig S1. The comparison of different duration of CZL80 treatment on neurological function after photothrombosis.** CZL80 ( $30 \text{ mg}\cdot\text{kg}^{-1}\cdot\text{d}^{-1}$ ) or vehicle was intraperitoneally injected daily during Day1-4, Day4-7 or Day1-7 after photothrombosis, and motor function was measured daily. (A) Foot fault of left forelimb in the grid-walking task and (B) Forelimb asymmetry in the cylinder task. All results were represented as means  $\pm$  SD ( $n=9$  per group). Statistical significance was determined using one-way ANOVA with Tukey's post hoc test, n.s. (not significant) and  $***P<0.001$  vs. PT.

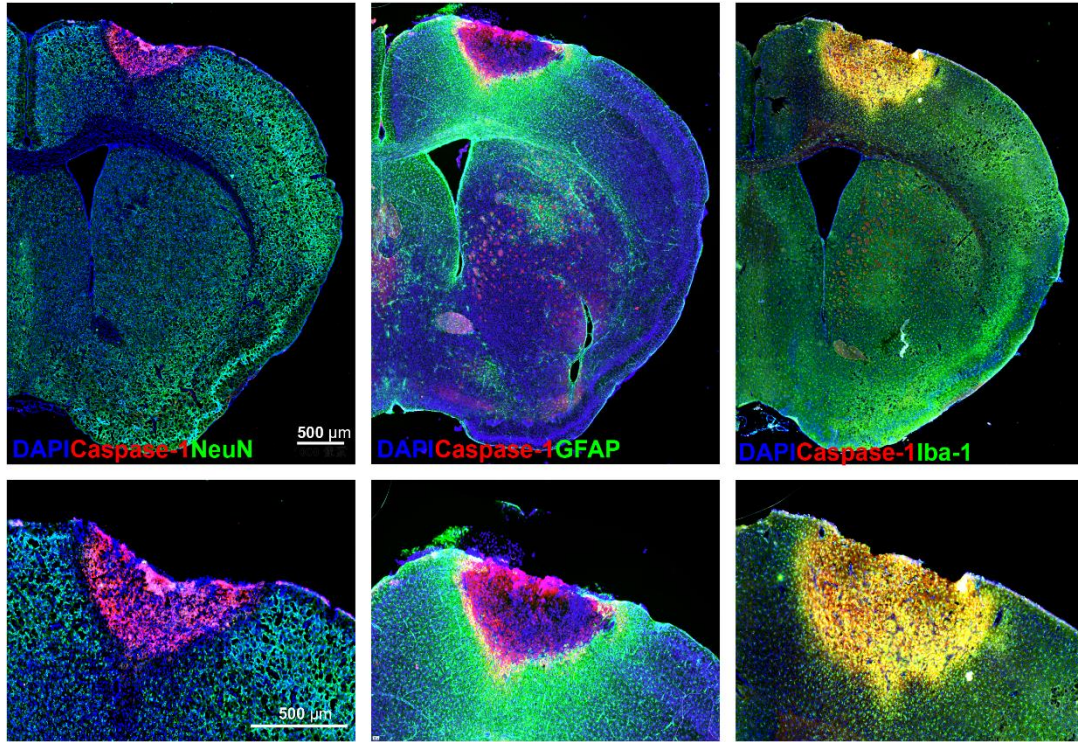

**Fig S2. Caspase-1 is derived from microglia.** Representative images showing the immunofluorescent staining of Caspase-1 with indicated cell types at Day7 after photothrombosis. The NeuN, GFAP and Iba-1 were taken as markers of neuron, astrocyte and microglia, respectively.
